# Supplementary material for: Distinct and stage-specific contributions of TET1 and TET2 to stepwise cytosine oxidation in the transition from naive to primed pluripotency
Source: Sci Rep. 2020 Jul 21;10:12066. doi: 10.1038/s41598-020-68600-3 (PMC7374584; doi:10.1038/s41598-020-68600-3)
Supplement: Supplementary file 1 — Supplementary Information 1. [file 41598_2020_68600_MOESM1_ESM.pdf]

## Supplementary Material

Distinct and stage-specific contributions of TET1 and TET2 to stepwise cytosine oxidation in the transition from naive to primed pluripotency

Christopher B. Mulholland<sup>1</sup>, Franziska R. Traube<sup>2</sup>, Enes Ugur<sup>2</sup>, Edris Parsa<sup>2</sup>, Eva-Maria Eckl<sup>1</sup>, Maximilian Schöning<sup>1</sup>, Miha Modic<sup>3</sup>, Michael D. Bartoschek<sup>1</sup>, Paul Stolz<sup>1</sup>, Joel Ryan<sup>1</sup>, Thomas Carell<sup>2</sup>, Heinrich Leonhardt<sup>\*1</sup> and Sebastian Bultmann<sup>\*1</sup>

<sup>1</sup>Department of Biology II and Center for Integrated Protein Science Munich (CIPSM), Ludwig-Maximilians-Universität München, Planegg-Martinsried, Germany

<sup>2</sup>Center for Integrated Protein Science (CIPSM) at the Department of Chemistry, Ludwig-Maximilians-Universität München, Munich, Germany

<sup>3</sup>The Francis Crick Institute, London NW1 1AT, United Kingdom

\* correspondence can be addressed to Sebastian Bultmann (bultmann@bio.lmu.de) and Heinrich Leonhardt (h.leonhardt@lmu.de)

**a**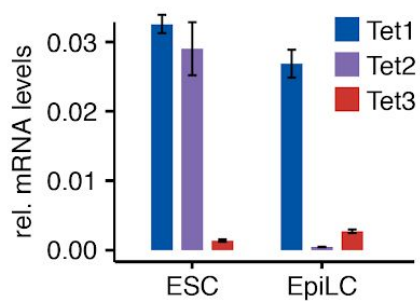**b**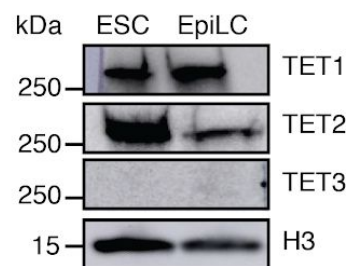**c**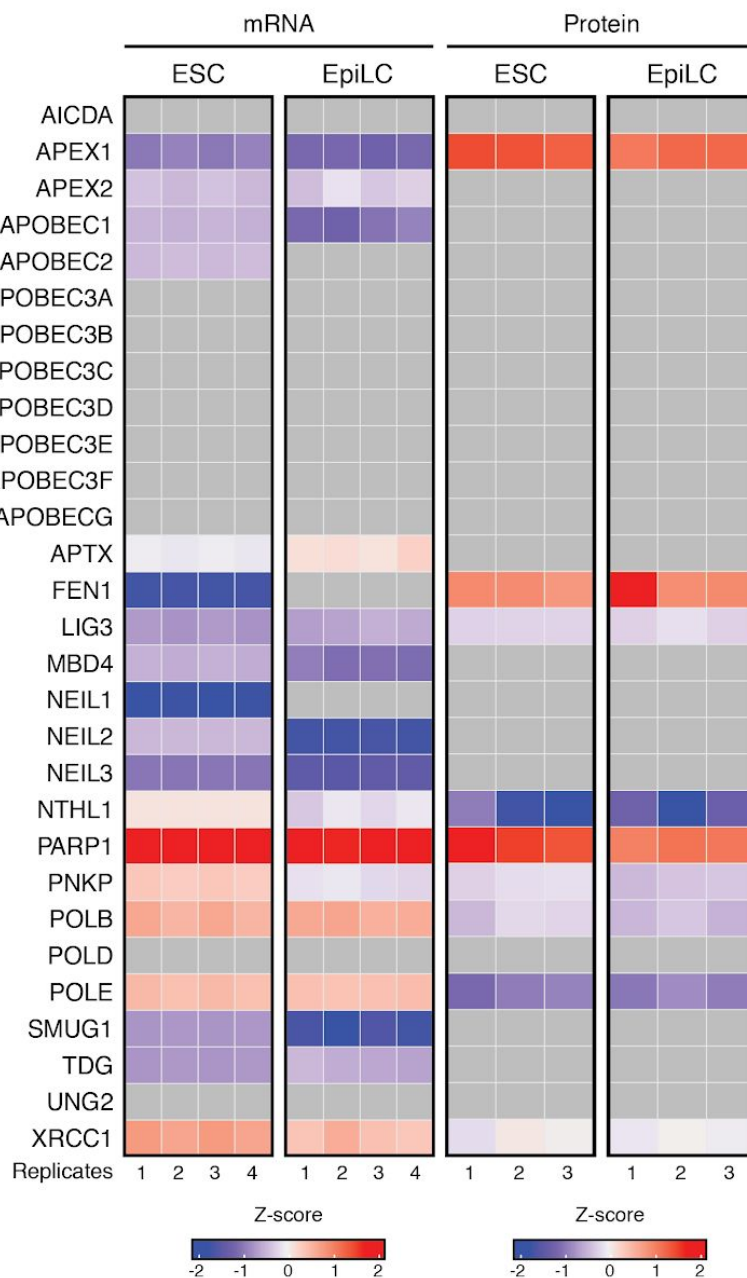

**Supplementary Figure S1: DNA modification dynamics during the naive to primed transition are accompanied by changes in the expression of DNA modifying enzymes.**

- (a)** Expression of DNA modifying enzymes in mESCs and mEpiLCs shown as the relative mRNA levels as a proportion of *Gapdh* at each stage of pluripotency. Error bars indicate mean  $\pm$  SD calculated from technical triplicate reactions from  $n = 3$  biological replicates.
- (b)** Western blot analysis of TET1, TET2, TET3 protein levels in wild-type ESCs and EpiLCs with histone H3 as loading control. Immunoblots were repeated 3 times with similar results obtained.
- (c)** Heatmaps depicting the mRNA levels (left) and protein abundance (right) of DNA repair factors in wild-type ESCs and EpiLCs. Z-scored (Z-score) transcript and protein levels are shown for individual biological replicates ( $n$  indicated at the bottom of the plots). Gray boxes are used for transcripts and proteins not detected in individual samples by RNA-seq or proteomics measurements, respectively.

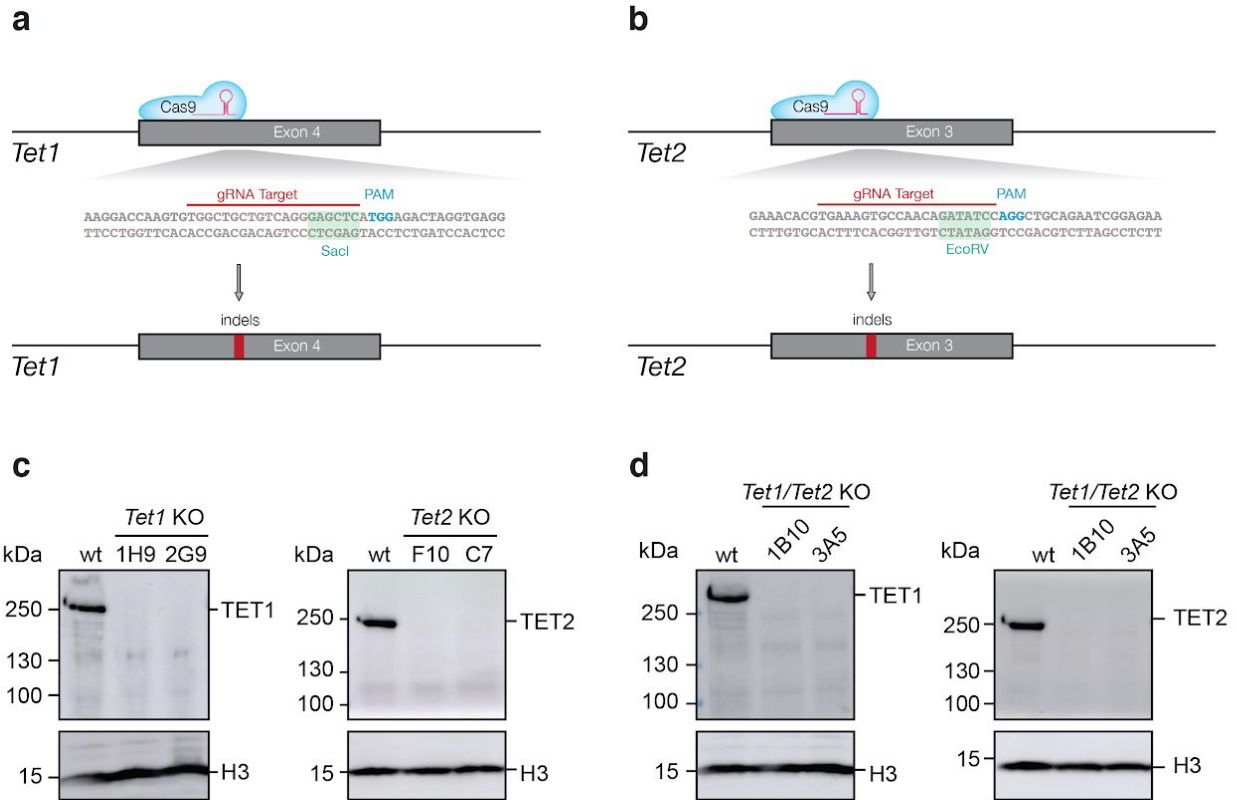

### Supplementary Figure S2: Generation and characterization of *Tet* KO cell lines

**(a-b)** Schematic representation of CRISPR/Cas9 targeting of *Tet1* (a) and *Tet2* (b) loci for KO generation using gRNA target sequences from <sup>61</sup>. For each gRNA, the PAM (NGG) and specific target sequence are indicated, as well as the location of the restriction enzyme recognition sites used for restriction fragment length polymorphism (RFLP) screening.

**(c-d)** Western blot analysis of TET1 and TET2 protein levels in *Tet1* KO and *Tet2* KO (c) and *Tet1/Tet2* DKO (d) cell lines with histone H3 as loading control. For each *Tet* KO, two independent clones were validated and used in all subsequent experiments. The clones validated via Western blot are as follows: *Tet1* KO (1H9 and 2G9), *Tet2* KO (F10 and C7), and *Tet1/Tet2* DKO (1B10 and 3A5). Immunoblots were repeated 3 times with similar results obtained.

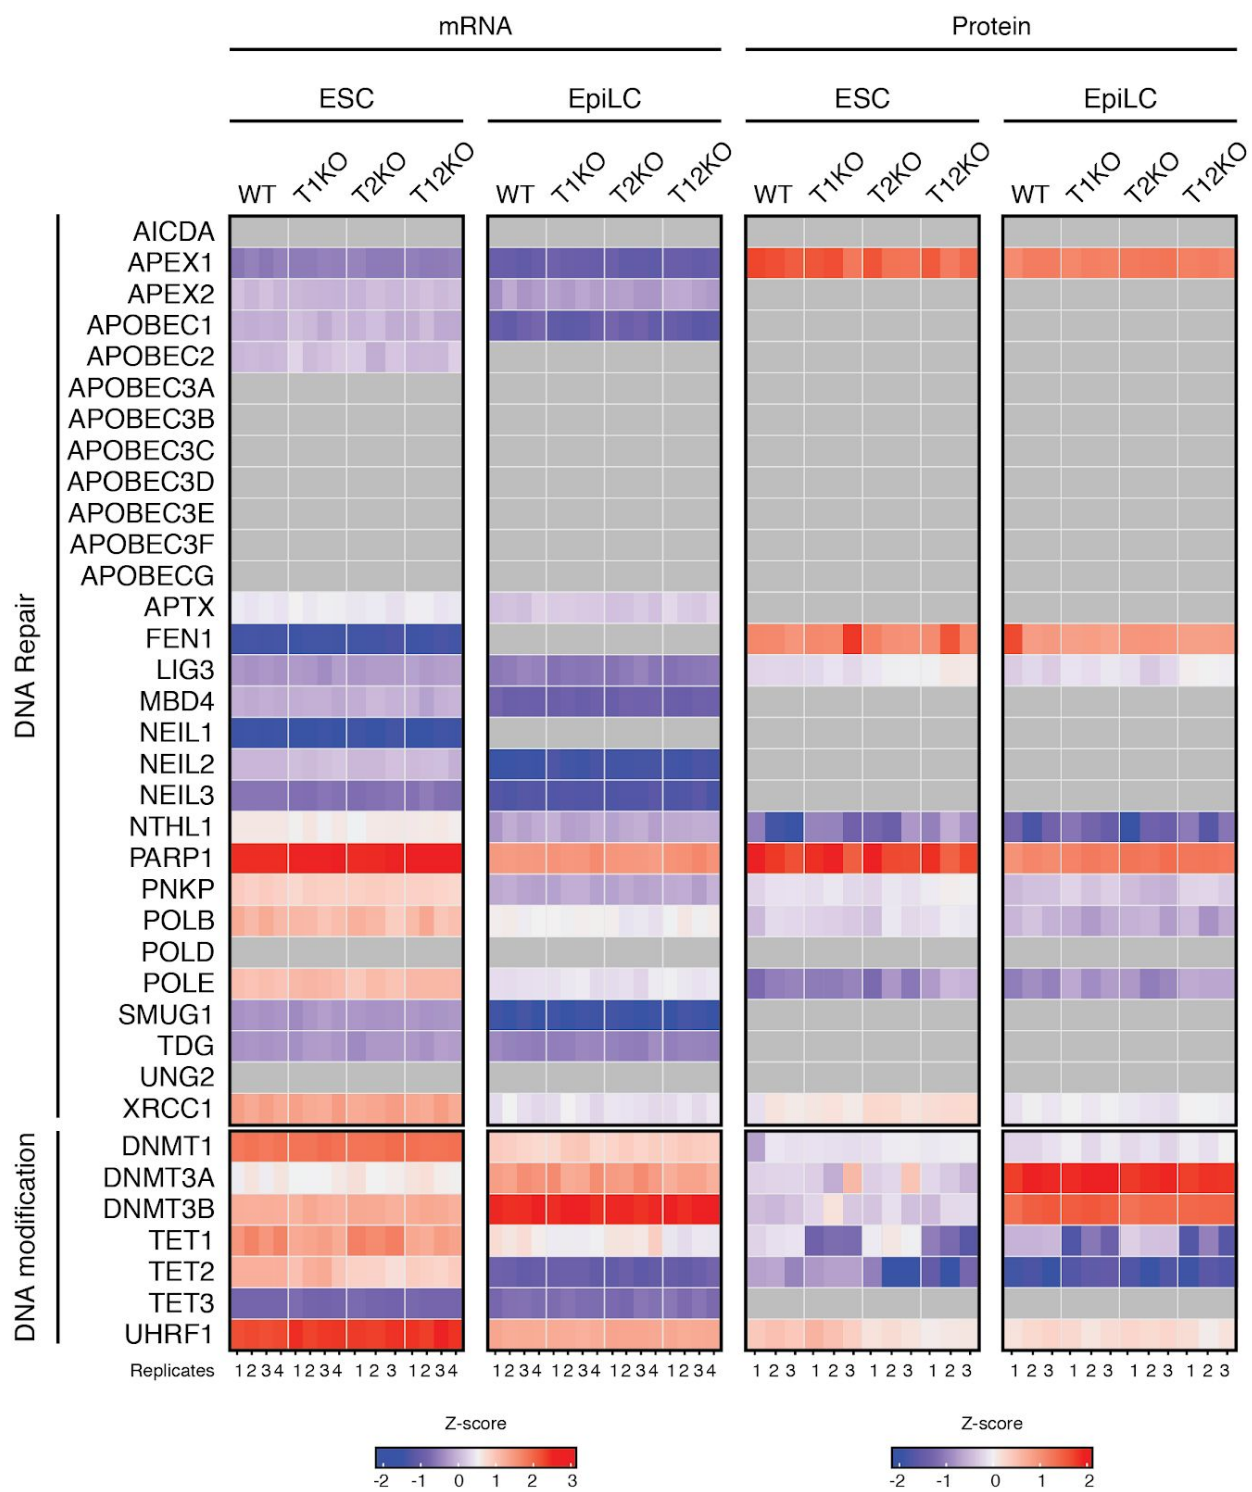

**Supplementary Figure S3: Comparison of mRNA and protein levels for DNA repair factors and DNA modifying enzymes among Tet KO ESCs and EpiLCs**

Heatmaps depicting the mRNA levels (left) and protein abundance (right) of DNA repair and modification factors in wild-type (WT), *Tet1* KO (T1KO), *Tet2* KO (T2KO), and *Tet1/Tet2* DKO (T12KO) ESCs and EpiLCs. Z-scored (Z-score) transcript and protein levels are shown for individual biological replicates (*n* indicated at the bottom of the plots). Gray boxes are used for transcripts and proteins not detected in individual samples by RNA-seq or proteomics measurements, respectively.

**a**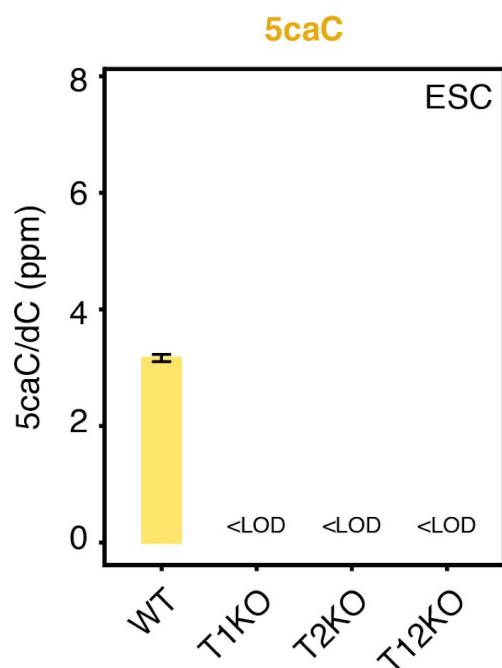**b**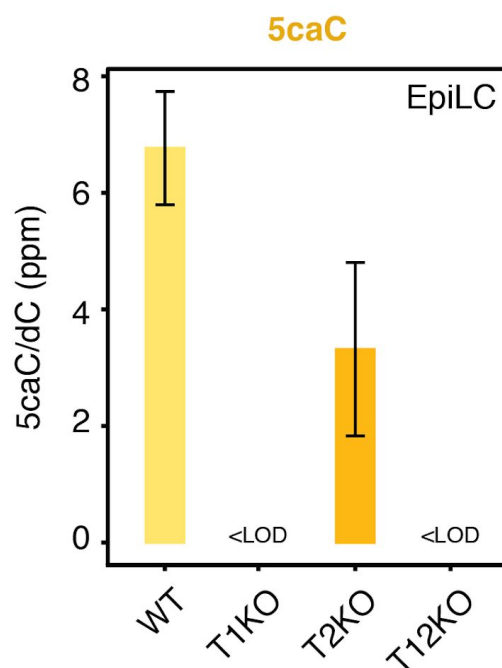

**Supplementary Figure S4: Global 5caC levels in *Tet* KO ESCs and EpiLCs**

**(a,b)** Global levels of 5caC in wild-type (WT), *Tet1* KO (T1KO), *Tet2* KO (T2KO), and *Tet1/Tet2* DKO (T12KO) ESCs **(a)** and EpiLCs **(b)** as determined by mass spectrometry (UHPLC-MS/MS). 5caC levels are expressed as parts per million (ppm: 1 ppm = 0.0001%) of total cytosine (dC). Error bars indicate mean  $\pm$  SD calculated from  $n = 6$  biological replicates for each genotype. LOD, limit of detection.

**Supplementary Figure S5**

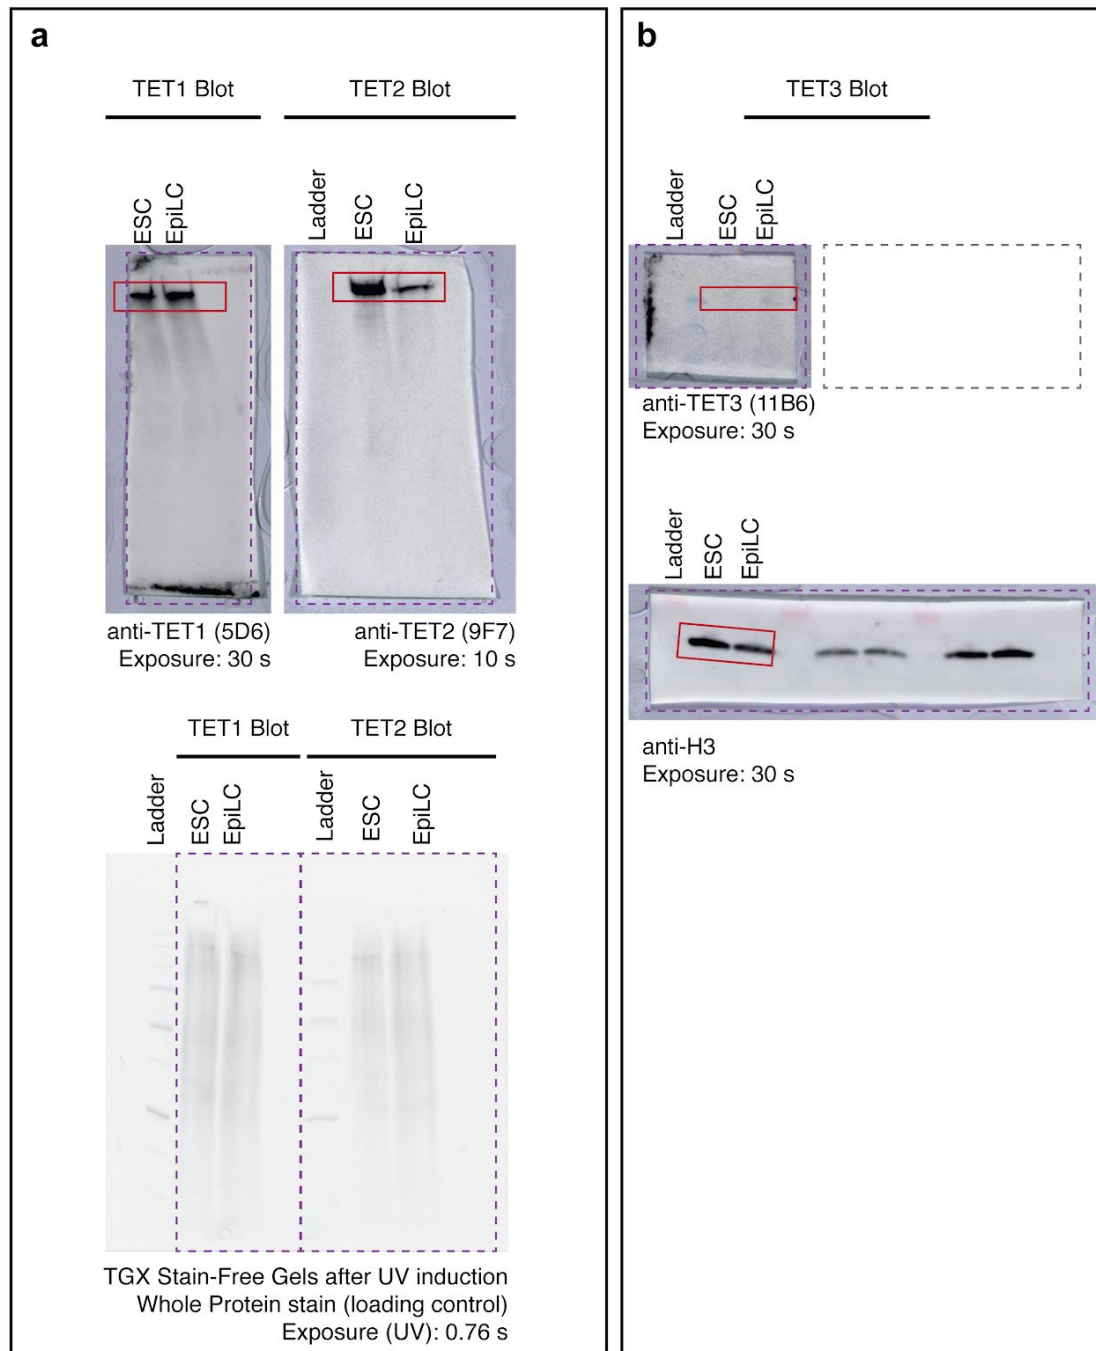

**Supplementary Figure S5: Original, uncropped Western Blots from Supplementary Fig. S1b**

Original, uncropped Western blots of TET1, TET2, and TET3 protein levels in wild-type ESCs and EpiLCs displayed in Supplementary Fig. S1b with whole protein stain (Tet1 and Tet2) or histone H3 (Tet3) serving as loading controls. Cropped areas are indicated by red boxes. Dotted purple lines delineate the relationship of cut blots. Grey dotted line indicates part of blot removed containing unrelated samples.

Supplementary Figure S6

a

Overlay

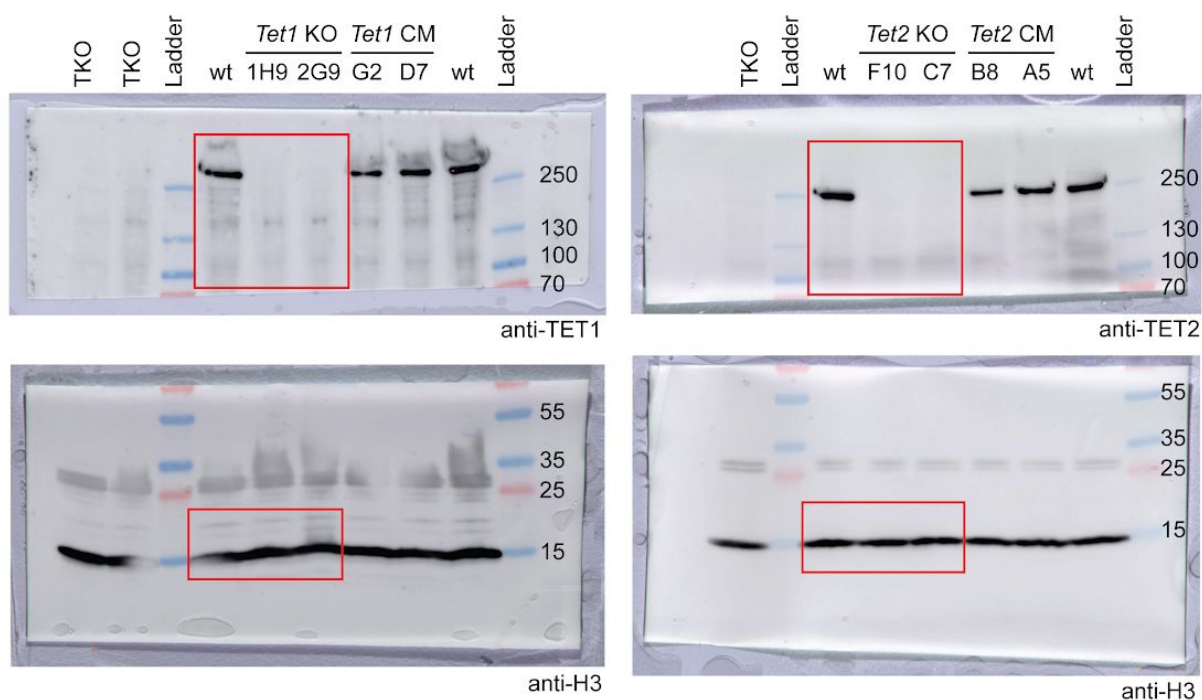

b

Unprocessed

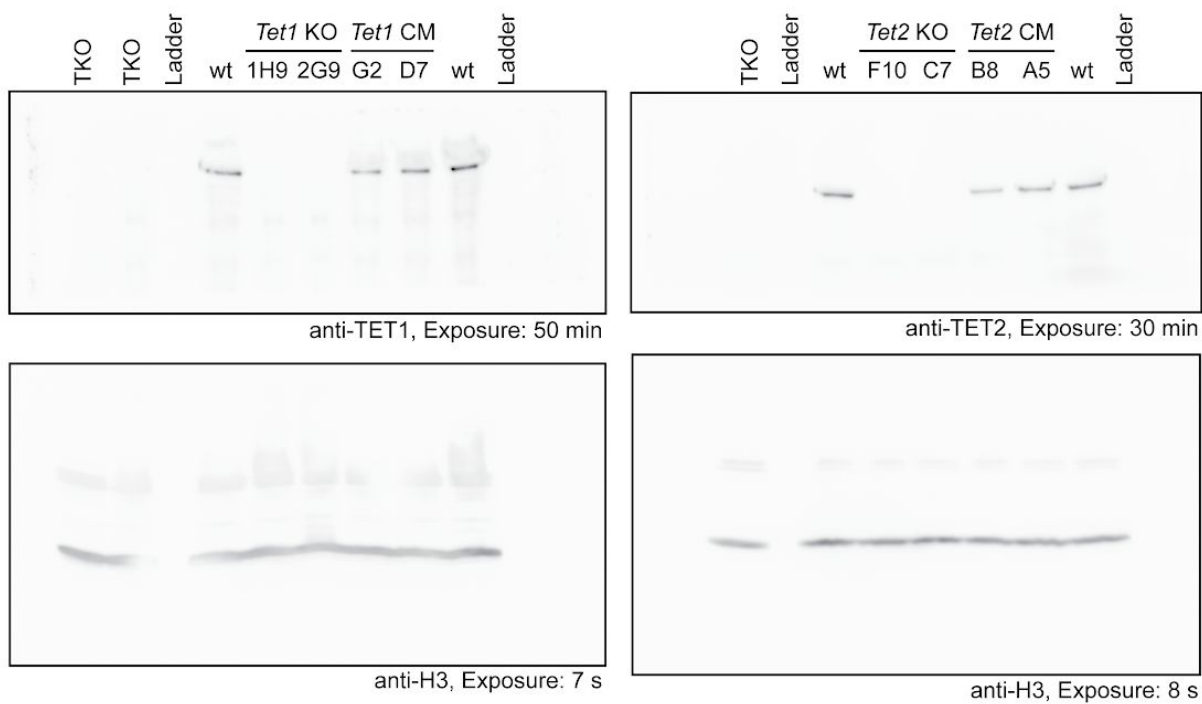

**Supplementary Figure S6: Original, uncropped Western Blots from Supplementary Fig. S2c**

Overlay (a) and unprocessed Western blots with indicated exposure times (b) of *Tet1* or *Tet2* single knockout (KO) ESCs displayed in Supplementary Figure S2c with histone H3 as loading control. Cropped areas are indicated by red boxes. Lysates from *Tet1/Tet2/Tet3* triple knockout (TKO) ESCs<sup>23</sup> are loaded as negative controls. Lysates from wild-type (wt) and *Tet1* or *Tet2* single catalytic mutant (CM) ESCs (unpublished) are loaded as positive controls.

Supplementary Figure S7

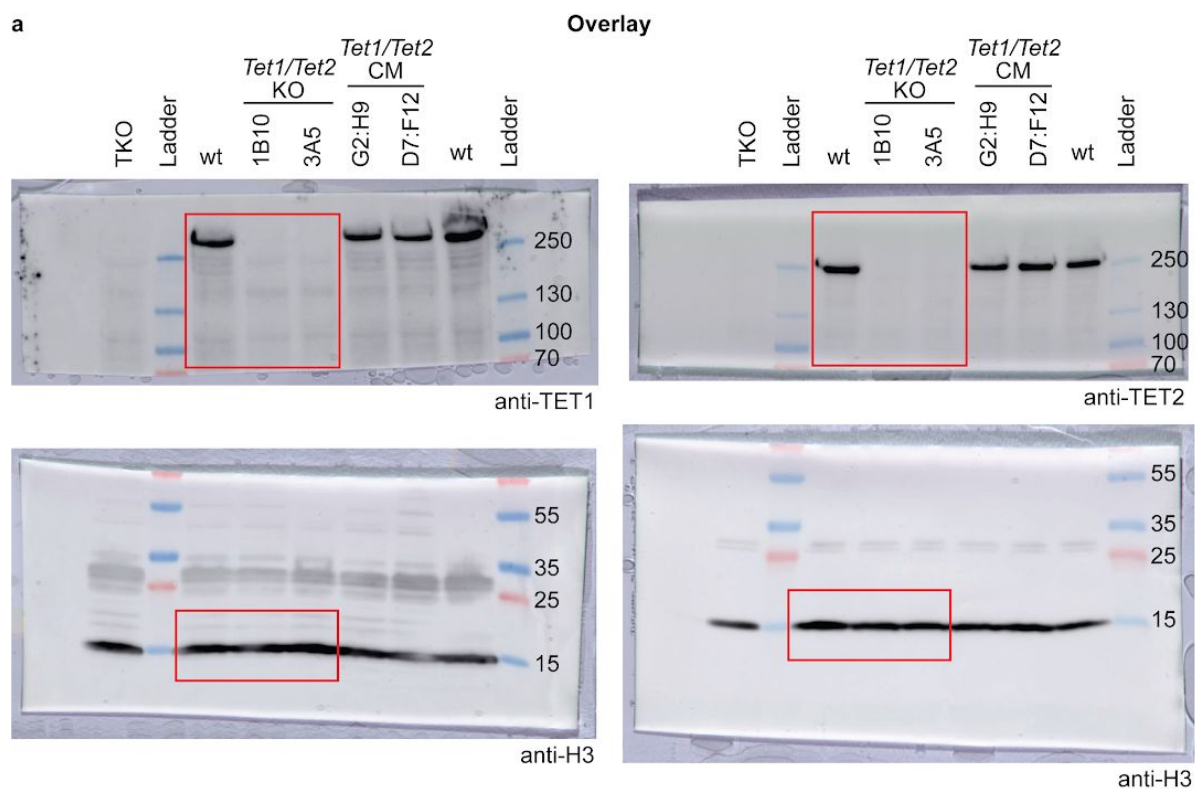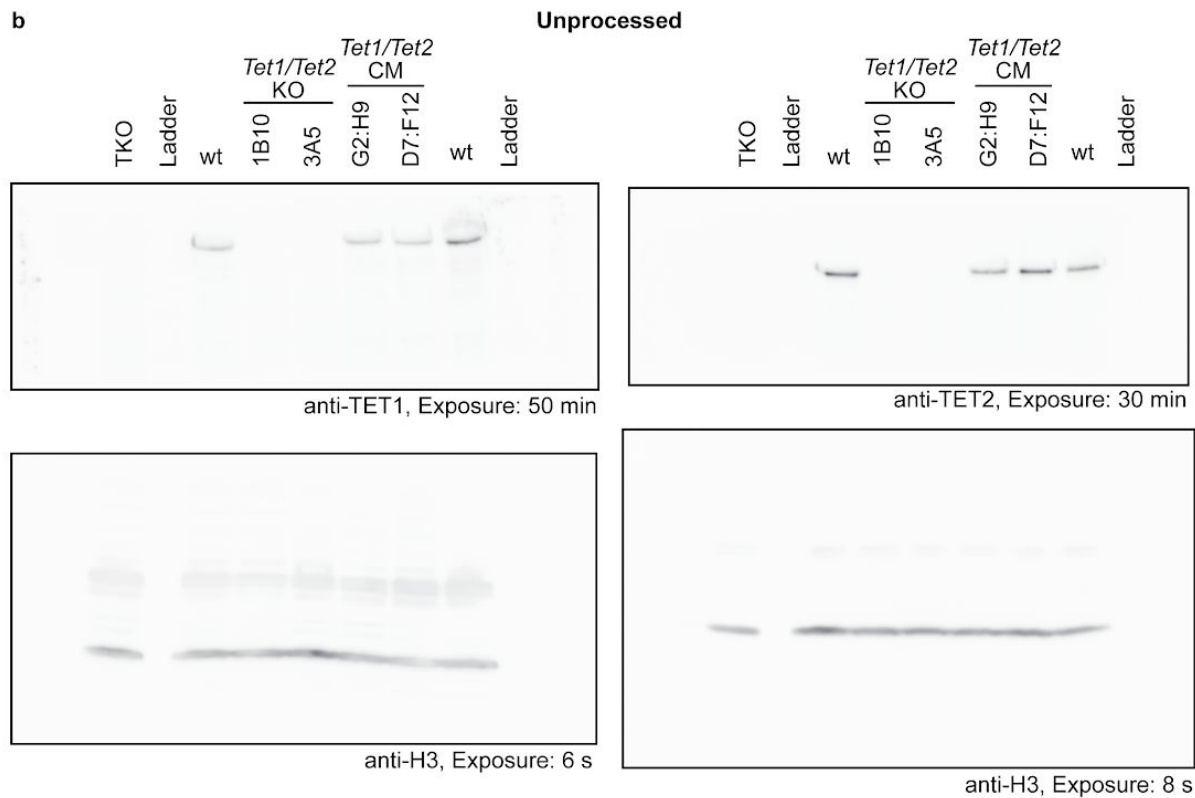

**Supplementary Figure S7: Uncropped Western Blots from Supplementary Fig. S2d**

Overlay (a) and unprocessed Western blots with indicated exposure times (b) of *Tet1/Tet2* double knockout (KO) ESCs displayed in Supplementary Figure S2d with histone H3 as loading control. Cropped areas are indicated by red boxes. Lysates from *Tet1/Tet2/Tet3* triple knockout (TKO) ESCs<sup>23</sup> are loaded as a negative control. Lysates from wild-type (wt) and *Tet1/Tet2* double catalytic mutant (CM) ESCs (unpublished) are loaded as positive controls.

**Supplementary Table S1: Modified Cytosine Level Quantification**

| condition | genotype | n  | 5mC/dC (%) | 5mC sd  | hmC/dC (%) | 5hmC sd | fC/dC (ppm) | 5fC sd | n | 5caC/dC (ppm) | 5caC sd |
|-----------|----------|----|------------|---------|------------|---------|-------------|--------|---|---------------|---------|
| ESC       | wt       | 18 | 3.1778     | 0.11707 | 0.1084     | 0.00022 | 5.7778      | 0.018  | 6 | 3.1700        | 0.0615  |
| ESC       | T1KO     | 18 | 3.6346     | 0.08240 | 0.0533     | 0.00096 | 2.8722      | 0.043  | 6 | <L.O.D        | <L.O.D  |
| ESC       | T2KO     | 12 | 3.9500     | 0.09779 | 0.0294     | 0.00699 | 0.7250      | 0.088  | 6 | <L.O.D        | <L.O.D  |
| ESC       | T12KO    | 12 | 3.6250     | 0.13198 | 0.0031     | 0.02495 | 0.4275      | 1.467  | 6 | <L.O.D        | <L.O.D  |
| EpiLC     | wt       | 24 | 6.8375     | 0.13878 | 0.5148     | 8.3E-05 | 17.0000     | 0.015  | 6 | 6.7700        | 0.9740  |
| EpiLC     | T1KO     | 12 | 7.7614     | 0.07211 | 0.0525     | 0.00169 | 2.6480      | 0.055  | 6 | <L.O.D        | <L.O.D  |
| EpiLC     | T2KO     | 12 | 8.2250     | 0.04174 | 0.3087     | 0.00042 | 4.4500      | 0.025  | 6 | 3.3200        | 1.4900  |
| EpiLC     | T12KO    | 12 | 7.8417     | 0.04468 | 0.0073     | 0.00549 | 0.3308      | 0.311  | 6 | <L.O.D        | <L.O.D  |

**Supplementary Table S2: Proteome profiling of Tet KO ESCs and EpiLCs**  
(see spreadsheet)

**Supplementary Table S3: Transcriptome profiling of Tet KO ESCs and EpiLCs**  
(see spreadsheet)

**Supplementary Table S4: Modified Cytosine Level Analysis**

| condition | genotype | 5mC [% wt 5mC] | 5hmC [% wt 5hmC] | 5fC [% wt 5fC] |
|-----------|----------|----------------|------------------|----------------|
| ESC       | T1KO     | 114.4 ± 2.6    | 49.1 ± 0.9       | 49.7 ± 0.7     |
| ESC       | T2KO     | 124.3 ± 3.1    | 27.1 ± 6.4       | 12.5 ± 1.5     |
| ESC       | T12KO    | 114.1 ± 4.2    | 2.8 ± 23.0       | 7.4 ± 2.4      |
| EpiLC     | T1KO     | 113.5 ± 1.1    | 10.2 ± 0.3       | 15.6 ± 0.3     |
| EpiLC     | T2KO     | 120.3 ± 0.6    | 60.0 ± 0.1       | 26.2 ± 0.1     |
| EpiLC     | T12KO    | 114.7 ± 0.7    | 1.4 ± 1.1        | 1.9 ± 1.8      |

**Supplementary Table S5: Oligonucleotides**

| <b>RT-qPCR Primers</b>                    |                              |
|-------------------------------------------|------------------------------|
| <b>Name</b>                               | <b>Sequence</b>              |
| Tet1_F                                    | CCAGGAAGAGGCGACTACGTT        |
| Tet1_R                                    | TTAGTGTTGTGTGAACCTGATTTATTGT |
| Tet2_F                                    | ACTTCTCTGCTCATTCCCACAGA      |
| Tet2_R                                    | GGTGCCTCTGGAGTGTGTTGGT       |
| Tet3_F                                    | GAGCACGCCAGAGAAGATCAA        |
| Tet3_R                                    | CAGGCTTTGCTGGGACAATC         |
| Dnmt1_F                                   | GGCGGAAATCAAAGGAGGAT         |
| Dnmt1_R                                   | CCTGGGTCTGGAACTTCTTTTATC     |
| Dnmt3a_F                                  | AAGTGCAGAAACATCGAGGACAT      |
| Dnmt3a_R                                  | CTGGCACATGCCTCCAATG          |
| Dnmt3b_F                                  | CCCGTTGCGACTTGGTGATTG        |
| Dnmt3b_R                                  | CTTCCTGTGCCCTCATATAAACCT     |
| Uhrf1_F                                   | GGCAGCTGAAGCGGATGA           |
| Uhrf1_R                                   | CCATGCACCGAAGATATTGTCA       |
| <b>Oligonucleotides for gRNA Cloning</b>  |                              |
| <b>Name</b>                               | <b>Sequence</b>              |
| Tet1_KO_gRNA_F                            | CACCGGCTGCTGTCAGGGAGCTCA     |
| Tet1_KO_gRNA_R                            | AAACTGAGCTCCCTGACAGCAGCC     |
| Tet2_KO_gRNA_F                            | CACCGAAAGTGCCAACAGATATCC     |
| Tet2_KO_gRNA_R                            | AAACGGATATCTGTTGGCACTTTC     |
| <b>Oligonucleotides for RFLP Analysis</b> |                              |
| <b>Name</b>                               | <b>Sequence</b>              |
| Tet1KO_scrF                               | TTGTTCTCTCCTCTGACTGC         |
| Tet1KO_scrR                               | TGATTGATCAAATAGGCCTGC        |
| Tet2KO_scrF                               | CAGATGCTTAGGCCAATCAAG        |
| Tet2KO_scrR                               | AGAAGCAACACACATGAAGATG       |

**Supplementary Table S6: Compound-dependent LC-MS/MS-parameters used for the analysis of genomic DNA**

| compound                                              | Precursor ion (m/z) | MS1 Resolution | Product Ion (m/z) | MS2 Resolution | Dwell time [ms] | CE (V) | CAV (V) | Polarity |
|-------------------------------------------------------|---------------------|----------------|-------------------|----------------|-----------------|--------|---------|----------|
| <b>Time segment 1.5-4.2 min</b>                       |                     |                |                   |                |                 |        |         |          |
| [ <sup>15</sup> N <sub>2</sub> ]-cadC                 | 274.08              | Wide           | 158.03            | Wide           | 60              | 5      | 5       | Positive |
| cadC                                                  | 272.09              | Wide           | 156.04            | Wide           | 60              | 5      | 5       | Positive |
| [ <sup>15</sup> N <sub>2</sub> ]-caC                  | 158.03              | Wide           | 140.09            | Wide           | 60              | 13     | 7       | Positive |
| caC                                                   | 156.04              | Wide           | 138.03            | Wide           | 60              | 13     | 7       | Positive |
| [ <sup>15</sup> N <sub>2</sub> ,D <sub>2</sub> ]-hmdC | 262.12              | Wide           | 146.07            | Wide           | 60              | 27     | 1       | Positive |
| hmdC                                                  | 258.11              | Wide           | 142.06            | Wide           | 60              | 27     | 1       | Positive |
| [D <sub>3</sub> ]-mdC                                 | 245.13              | Wide           | 129.09            | Wide           | 60              | 60     | 1       | Positive |
| mdC                                                   | 242.11              | Wide           | 126.07            | Wide           | 60              | 60     | 1       | Positive |
| dC                                                    | 228.10              | Wide           | 112.05            | Wide           | 1               | 1      | 0       | Positive |
| <b>Time segment 4.2-9 min</b>                         |                     |                |                   |                |                 |        |         |          |
| [ <sup>15</sup> N <sub>5</sub> ]-8-oxo-dG             | 289.08              | Wide           | 173.04            | Wide           | 80              | 9      | 7       | Positive |
| 8-oxo-dG                                              | 284.10              | Wide           | 168.05            | Wide           | 80              | 9      | 7       | Positive |
| [ <sup>15</sup> N <sub>2</sub> ]-fdC                  | 258.09              | Wide           | 142.04            | Wide           | 80              | 5      | 5       | Positive |
| fdC                                                   | 256.09              | Wide           | 140.05            | Wide           | 80              | 5      | 5       | Positive |
| [ <sup>15</sup> N <sub>2</sub> ]-fC                   | 142.04              | Wide           | 98.04             | Wide           | 80              | 13     | 7       | Positive |
| fC                                                    | 140.05              | Wide           | 97.04             | Wide           | 80              | 13     | 7       | Positive |

CE: collision energy, CAV: collision cell accelerator voltage, EMV: electron multiplier voltage. The nucleosides were analyzed in the positive ([M+H]<sup>+</sup> species) as well as the negative ([M-H]<sup>-</sup> species) ion selected reaction monitoring mode (SRM).
